# Supplementary material for: Does a maternal history of abuse before pregnancy affect pregnancy outcomes? A systematic review with meta-analysis
Source: Springer Nature journal article supplement (doi:10.1186/s12884-018-2030-8), 2018-10-16
Supplement: MOESM2 [file 16203962]

## **Ovid MEDLINE(R) Epub Ahead of Print, In-Process & Other Non-Indexed Citations, Ovid MEDLINE(R) Daily and Ovid MEDLINE(R) <1946 to Present>**

- 1 exp Premature Birth/ or exp Obstetric Labor, Premature/
- 2 (((premature or preterm) adj3 (birth or infant\* or neonat\* or labo?r or delivery)) or prematurity).ti,ab,kf.
- 3 exp Infant, Low Birth Weight/
- 4 (birthweight or birth weight).ti,ab,kf.
- 5 Fetal Growth Retardation/ or (small for gestational age or small for date).ti,ab,kf. or ((fetal growth or intrauterine growth) adj2 (retard\* or restrict\*)).ti,ab,kf.
- 6 or/1-5
- 7 exp domestic violence/ or spouse abuse/ or intimate partner violence/ or physical abuse/
- 8 (violen\* or assault\* or aggression or forced sex or rape or incest or molest\* or neglect\* or maltreat\* or mistreat\* or torture\* or victim\* or battered wom#n).ti,ab,kf.
- 9 ((verbal or physical or psychological or spous\* or partner\* or emotional or sexual or domestic or wife or wives or husband\* or child\*) adj3 abus\*).ti,ab,kf.
- 10 or/7-9
- 11 6 and 10
- 12 remove duplicates from 11

## **Ovid EMBASE, 1974-Current**

- 1 exp Prematurity/ or exp Premature labor/
- 2 (((premature or preterm) adj3 (birth or infant\* or neonat\* or labo?r or deliver\*)) or prematurity).ti,ab,kw.
- 3 exp low birth weight/
- 4 (birth weight or birthweight).ti,ab,kw.
- 5 intrauterine growth retardation/ or exp small for date infant/ or (small for gestational age or small for date).ti,ab,kw. or ((fetal growth or intrauterine growth) adj2 (retard\* or restrict\*)).ti,ab,kw.
- 6 or/1-5
- 7 exp domestic violence/
- 8 (violen\* or assault\* or aggression or forced sex or rape or incest or molest\* or neglect\* or maltreat\* or mistreat\* or victim\* or torture\*).ti,ab,kw.
- 9 ((verbal or physical or psychological or spous\* or partner\* or emotional or sexual or domestic or wife or wives or husband\* or child\*) adj3 abus\*).ti,ab,kw.
- 10 or/7-9
- 11 6 and 10
- 12 remove duplicates from 11

## **Wiley COCHRANE Database of Systematic Reviews and Central Register of Controlled Trials**

- #1 [mh "premature birth"] or [mh "obstetric labor, premature"] or [mh "infant, low birth weight"] or [mh "fetal growth retardation"]
- #2 ((premature or preterm) near/3 (birth or infant\* or neonat\* or labor or labour or delivery)):ti,ab,kw
- #3 (birthweight or "birth weight" or "small for gestational age" or "small for date"):ti,ab,kw
- #4 (("fetal growth" or "intrauterine growth") near/2 (retard\* or restrict\*)):ti,ab,kw
- #5 #1 OR #2 OR #3 OR #4

#6 [mh "domestic violence"] OR [mh "spouse abuse"] OR [mh "intimate partner violence"] OR [mh "physical abuse"]

#7 (violen\* or assault\* or aggression or "forced sex" or rape or incest or molest\* or neglect\* or maltreat\* or mistreat\* or torture\* or victim\* or "battered women" or "battered woman"):ti,ab,kw

#8 ((verbal or physical or psychological or spous\* or partner\* or emotional or sexual or domestic or wife or wives or husband\* or child\*) near/3 abus\*):ti,ab,kw

#9 #6 OR #7 OR #8

#10 #5 AND #9

### **Scopus, 1960-Current**

(TITLE-ABS-KEY(((premature or preterm) pre/3 (birth or infant\* or neonat\* or labor or labour or deliver\*)) or prematurity OR "small for gestational age" or "small for date" or (("fetal growth" or "intrauterine growth") w/2 (restrict\* or retard\*)) ) AND TITLE(violen\* or assault\* or aggression or "forced sex" or rape or incest or molest\* or neglect\* or maltreat\* or mistreat\* or torture\* or victim\* or "battered women" or "battered woman" OR ((verbal or physical or psychological or spous\* or partner\* or emotional or sexual or domestic or wife or wives or husband\* or child\*) w/3 abus\* ))) OR (TITLE(((premature or preterm) pre/3 (birth or infant\* or neonat\* or labor or labour or deliver\*)) or prematurity OR "small for gestational age" or "small for date" or (("fetal growth" or "intrauterine growth") w/2 (restrict\* or retard\*)) ) AND TITLE-ABS-KEY(violen\* or assault\* or aggression or "forced sex" or rape or incest or molest\* or neglect\* or maltreat\* or mistreat\* or torture\* or victim\* or "battered women" or "battered woman" OR ((verbal or physical or psychological or spous\* or partner\* or emotional or sexual or domestic or wife or wives or husband\* or child\*) w/3 abus\* )))

### **Web of Science Core Collection, 1900-Current**

(premature or preterm) near/3 (birth or infant\* or neonat\* or labor or labour or deliver\*) or prematurity OR "small for gestational age" or "small for date" or ("fetal growth" or "intrauterine growth") near/2 (restrict\* or retard\*)

AND

violen\* or assault\* or aggression or "forced sex" or rape or incest or molest\* or neglect\* or maltreat\* or mistreat\* or torture\* or victim\* or "battered women" or "battered woman" OR (verbal or physical or psychological or spous\* or partner\* or emotional or sexual or domestic or wife or wives or husband\* or child\*) near/3 abus\*

### **EBSCO CINAHL Plus with Full-text, 1937-Current**

( (MH "Childbirth, Premature") OR (MH "Infant, Low Birth Weight+") OR (MH "Infant, Premature") OR (MH "Labor, Premature") OR (MH "Infant, Small for Gestational Age") OR (MH "Fetal Growth Retardation") ) OR ( (premature or preterm) w3 (birth or infant\* or neonat\* or labor or labour or deliver\*) or prematurity ) OR ( "small for gestational age" or "small for date" or ("fetal growth" or "intrauterine growth") n2 (restrict\* or retard\*) )

AND

( (MH "Domestic Violence+") OR (MH "Torture") OR (MH "Verbal Abuse") ) OR ( violen\* or assault\* or aggression or "forced sex" or rape or incest or molest\* or neglect\* or maltreat\* or mistreat\* or torture\* or victim\* or "battered women" or "battered woman" ) OR ( (verbal or physical or psychological or spous\* or partner\* or emotional or sexual or domestic or wife or wives or husband\* or child\*) n3 abus\* )

### **EBSCO Violence & Abuse Abstracts, 1971-Current**

( (premature or preterm) w3 (birth or infant\* or neonat\* or labor or labour or deliver\*) or prematurity ) OR ( "small for gestational age" or "small for date" or ("fetal growth" or "intrauterine growth") n2 (restrict\* or retard\*) )

AND

( violen\* or assault\* or aggression or "forced sex" or rape or incest or molest\* or neglect\* or maltreat\* or mistreat\* or torture\* or victim\* or "battered women" or "battered woman" ) OR ( (verbal or physical or psychological or spous\* or partner\* or emotional or sexual or domestic or wife or wives or husband\* or child\*) n3 abus\* )

### **ProQuest PILOTS (Published International Literature on Traumatic Stress)**

((premature OR preterm) PRE/3 (birth OR infant\* OR neonat\* OR labor OR labour OR deliver\*) OR prematurity) OR ("small for gestational age" OR "small for date" OR ("fetal growth" OR "intrauterine growth") NEAR/2 (restrict\* OR retard\*))

AND

(violen\* OR assault\* OR aggression OR "forced sex" OR rape OR incest OR molest\* OR neglect\* OR maltreat\* OR mistreat\* OR torture\* OR victim\* OR "battered women" OR "battered woman") OR ((verbal OR physical OR psychological OR spous\* OR partner\* OR emotional OR sexual OR domestic OR wife OR wives OR husband\* OR child\*) NEAR/3 abus\*)

### **ProQuest Dissertations & Theses Global, 1861-Current**

((premature OR preterm) PRE/3 (birth OR infant\* OR neonat\* OR labor OR labour OR deliver\*) OR prematurity) OR ("small for gestational age" OR "small for date" OR ("fetal growth" OR "intrauterine growth") NEAR/2 (restrict\* OR retard\*))

AND

(violen\* OR assault\* OR aggression OR "forced sex" OR rape OR incest OR molest\* OR neglect\* OR maltreat\* OR mistreat\* OR torture\* OR victim\* OR "battered women" OR "battered woman") OR ((verbal OR physical OR psychological OR spous\* OR partner\* OR emotional OR sexual OR domestic OR wife OR wives OR husband\* OR child\*) NEAR/3 abus\*)
